# Supplementary material for: UV electroluminescence emissions from high-quality ZnO/ZnMgO multiple quantum well active layer light-emitting diodes
Source: Royal Society of Chemistry journal article supplement (doi:10.1039/d1ra06685d), 2021-01-01
Supplement: d1ra06685d1.pdf [file d1ra06685d1.pdf]

## Electronic Supplementary Information for

# UV Electroluminescence Emissions from High-Quality ZnO/ZnMgO Multiple Quantum Wells Active Layer Light-Emitting Diodes

Shanshan Chen,<sup>abc</sup> Tengrun Zhan,<sup>a</sup> Xinhua Pan,<sup>\*cde</sup> Haiping He,<sup>cd</sup> Jingyun Huang,<sup>cd</sup> Bin Lu,<sup>cd</sup>

and Zhizhen Ye<sup>cde</sup>

<sup>a</sup> School of Materials and Energy, Guangdong University of Technology, Guangzhou 510006, People's Republic of China

<sup>b</sup> Guangdong Provincial Key Laboratory of Information Photonics Technology, Guangzhou 510006, People's Republic of China

<sup>c</sup> State Key Laboratory of Silicon Materials, Zhejiang University, Hangzhou 310027, People's Republic of China

<sup>d</sup> School of Materials Science and Engineering, Cyrus Tang Center for Sensor Materials and Applications, Zhejiang University, Hangzhou 310027, People's Republic of China

<sup>e</sup> Wenzhou Key Laboratory of Novel Optoelectronic and Nano Materials, Institute of Wenzhou, Zhejiang University, Wenzhou 325006, P. R. China

\* Corresponding Authors E-mail: X.H. Pan: [panxinhua@zju.edu.cn](mailto:panxinhua@zju.edu.cn)

The thickness of  $Zn_{1-x}Mg_xO$  barrier layer and ZnO well layer was determined by controlling deposition rate and time. Figure S1 shows the cross-sectional SEM image of a thick ZnO layer grown under the same epitaxial conditions. The thickness of the thick layer is 373 nm with the deposition time of 4 hours. The deposition time for  $Zn_{1-x}Mg_xO$  barrier layer is 400 s and calculated thickness is about 10 nm. As for the ZnO well layers, the deposition time is varied by 80 s, 160 s, 240 s and 320 s. Thus, the corresponding thickness are 2 nm, 4 nm, 6 nm and 8 nm, respectively.

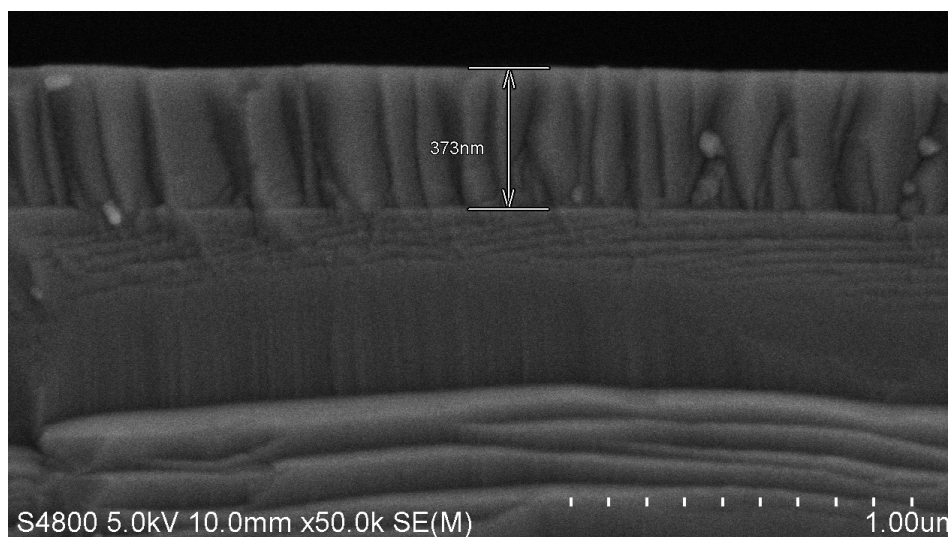

**Figure S1** Cross-sectional SEM image of ZnO layer with the deposition time of 4 hours.

**Table S1** The FWHM values of (002) and (102) X-ray rocking curves for GaN/ $Al_2O_3$  template and  $Zn_{1-x}Mg_xO$  films.

| Samples        | FWHM (arcsec) |              |              |
|----------------|---------------|--------------|--------------|
|                | (002)         | (102) of GaN | (102) of ZnO |
| GaN/ $Al_2O_3$ | 218           | 303          | --           |

|        |     |     |     |
|--------|-----|-----|-----|
| x=0    | 242 | 326 | 660 |
| x=0.04 | 225 | 295 | 620 |
| x=0.08 | 230 | 340 | 668 |
| x=0.10 | 257 | 341 | 668 |

**Table S2** The related electrical properties of films for the simulation.

| Samples |                        | Values                             |
|---------|------------------------|------------------------------------|
| p-GaN   | Hole concentration     | $5 \times 10^{17} \text{ cm}^{-3}$ |
|         | Thickness              | 2 $\mu\text{m}$                    |
| n-ZnO   | Electron concentration | $2 \times 10^{18} \text{ cm}^{-3}$ |
|         | Thickness              | 300 nm                             |

**Figure S2.** The simulated LED structures of (a) p-GaN/n-ZnO diode and (b) p-GaN/MQWs/n-ZnO diode.

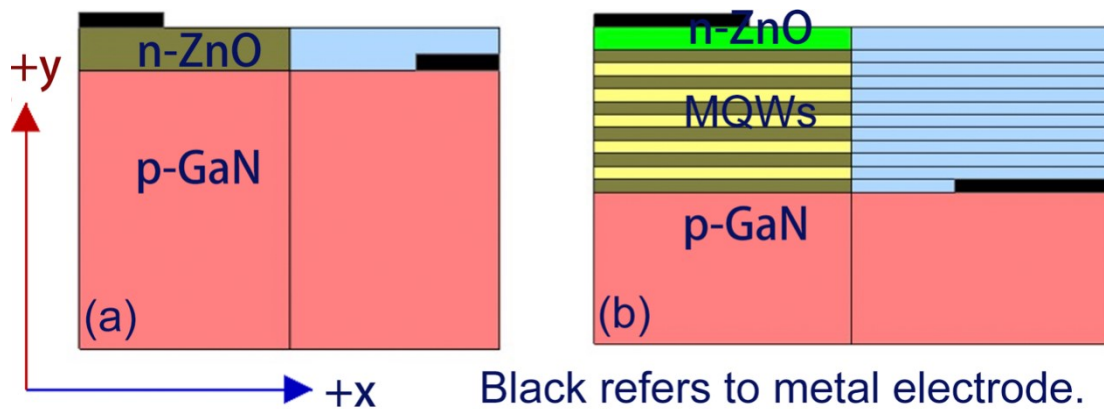

The simulation package APSYS is based on finite element analysis. And it includes the physical models such as hot carrier transport, heterojunction models and thermal analysis. The detailed equations define on the band offsets or carrier concentrations are available in the manual provided by Crosslight Software Inc. (<https://crosslight.com>).

Electron affinity parameters of GaN, MgO and ZnO refer to the following two literatures:

1. H. ZHU, et al, Ultraviolet Electroluminescence from MgZnO-Based Heterojunction Light-Emitting Diodes, *J. Phys. Chem. C* 2009, 113, 2980–2982.
2. H.H. Zhang, et al, Mg composition dependent band offsets of ZnMgO-ZnO heterojunctions, *Phys.Chem. Chem. Phys.*, 2013, 15, 11231.
